# Supplementary material
Source: Springer Nature journal article supplement (https://www.springermedizin.de/resource/supplementary/12876_2008_307_MOESM4_ESM.pdf/9439126)

Review: Probiotics data only

Comparison: 01 Probiotics Vs control

Outcome: 03 improvement in abdominal pain dichotomous

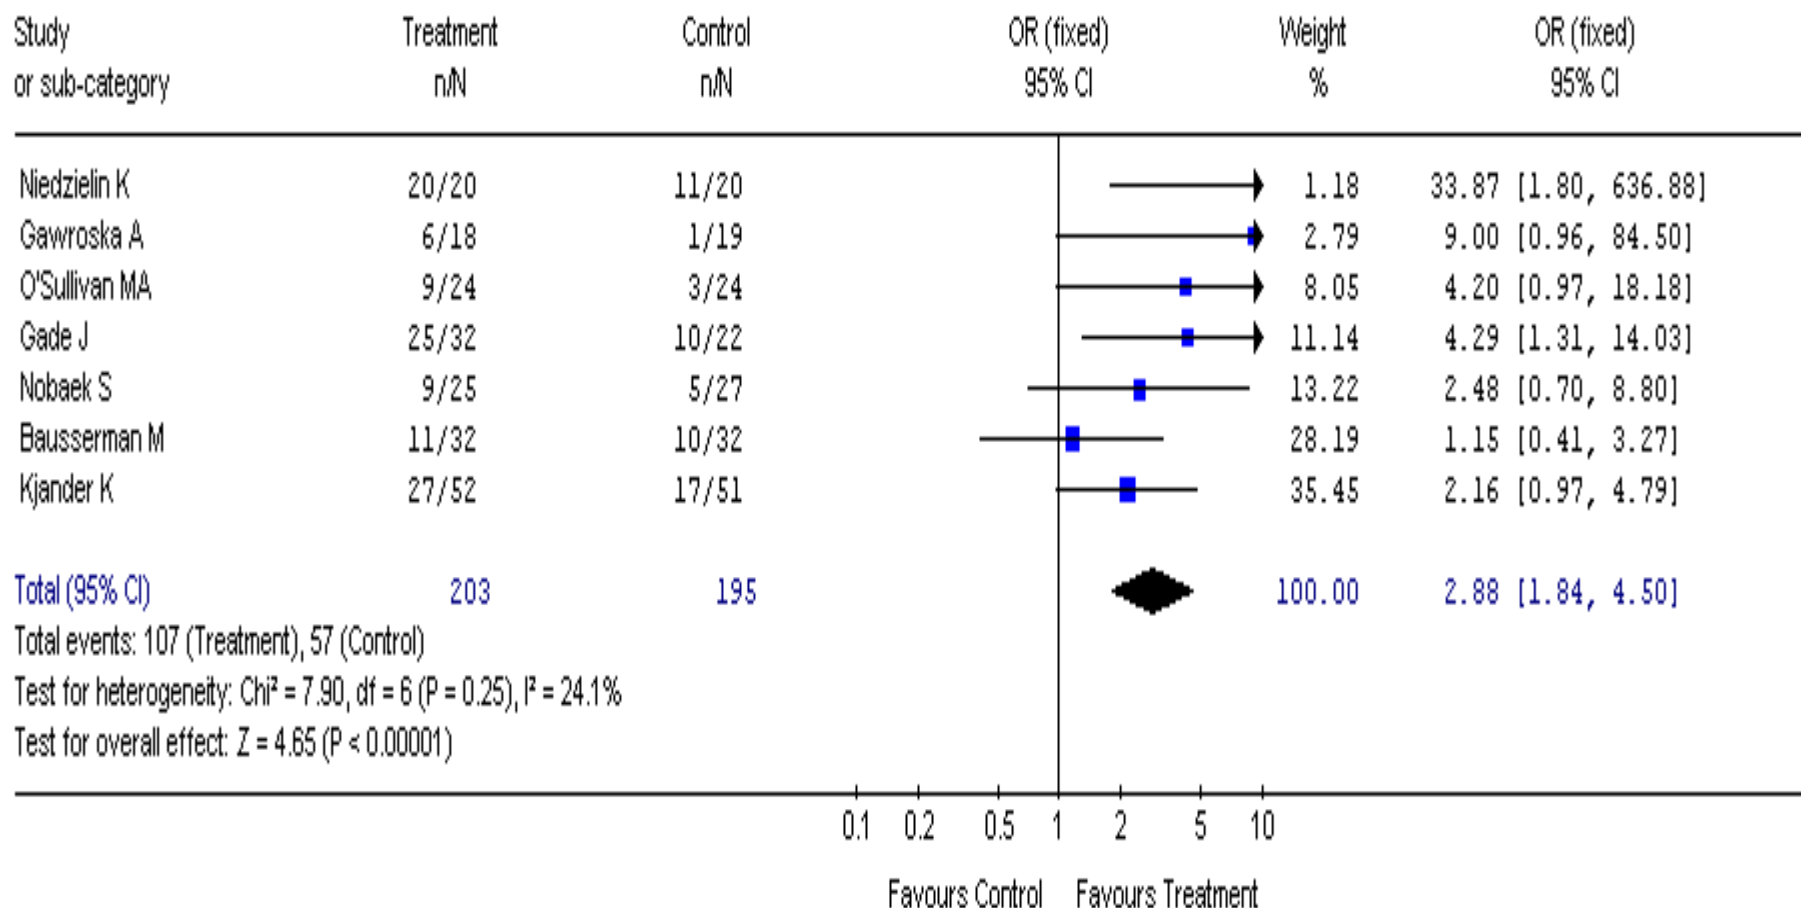

Supplement: MOESM4 [file 9439126]
